# Supplementary material
Source: publisher site journal article supplement (https://www.dovepress.com/get_supplementary_file.php?f=289241.docx)
Supplement: Supplementary file 1 [file get_supplementary_file.php]

**
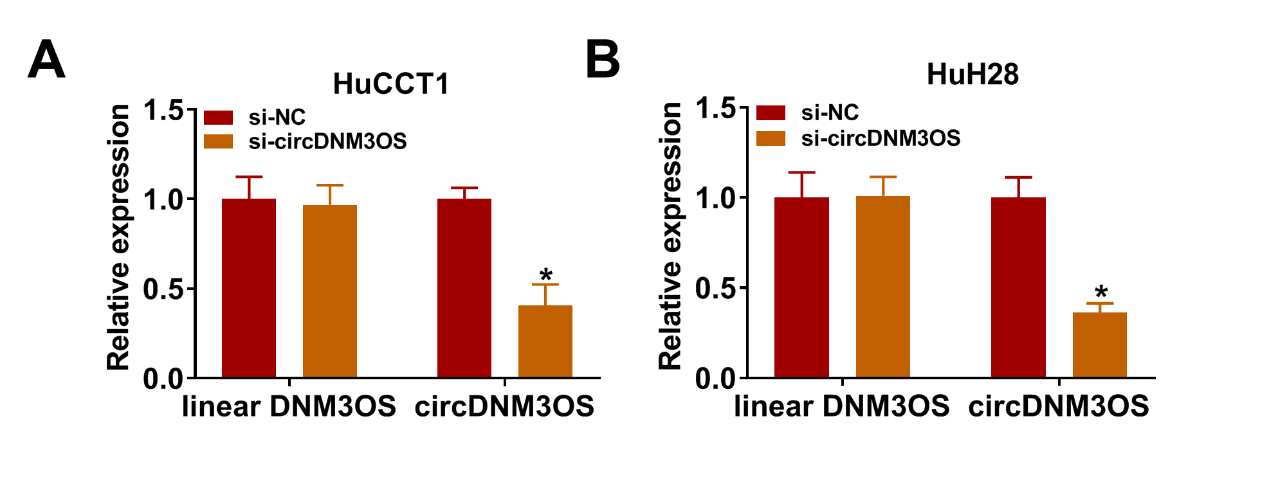
**

**Supplementary Fig.1 QRT-PCR verified the expression of circDNM3OS and DNM3OS mRNA in HuCCT1 and HuH28 cells transfected with si-NC or sh-circDNM3OS.**

**
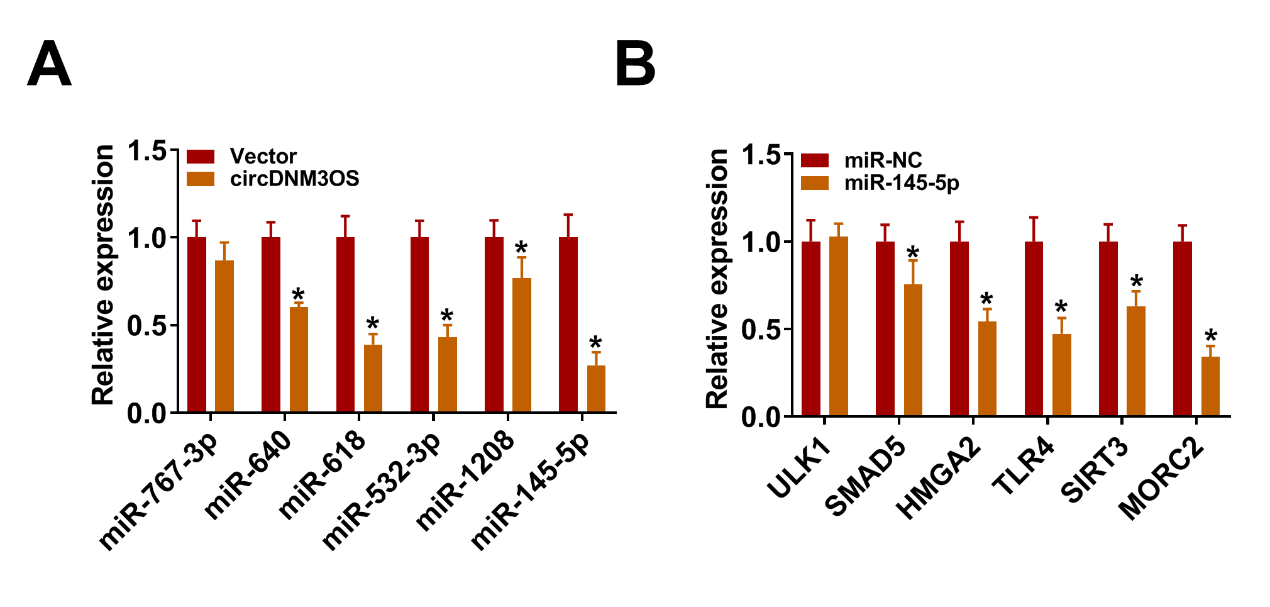
**

**Supplementary Fig.2 Pre-analysis of randomly selected miRs and targets after bioinformatics analysis.** (A) QRT-PCR verified the expression of 6 candidate miRs in HuCCT1 and HuH28 cells transfected Vector or circDNM3OS. (B) QRT-PCR verified the expression of 6 candidate targets in HuCCT1 and HuH28 cells transfected miR-NC or miR-145-5p.
